# Supplementary material
Source: PubMed Central journal article supplement (PMC3444277)

# Supplemental Figure 1

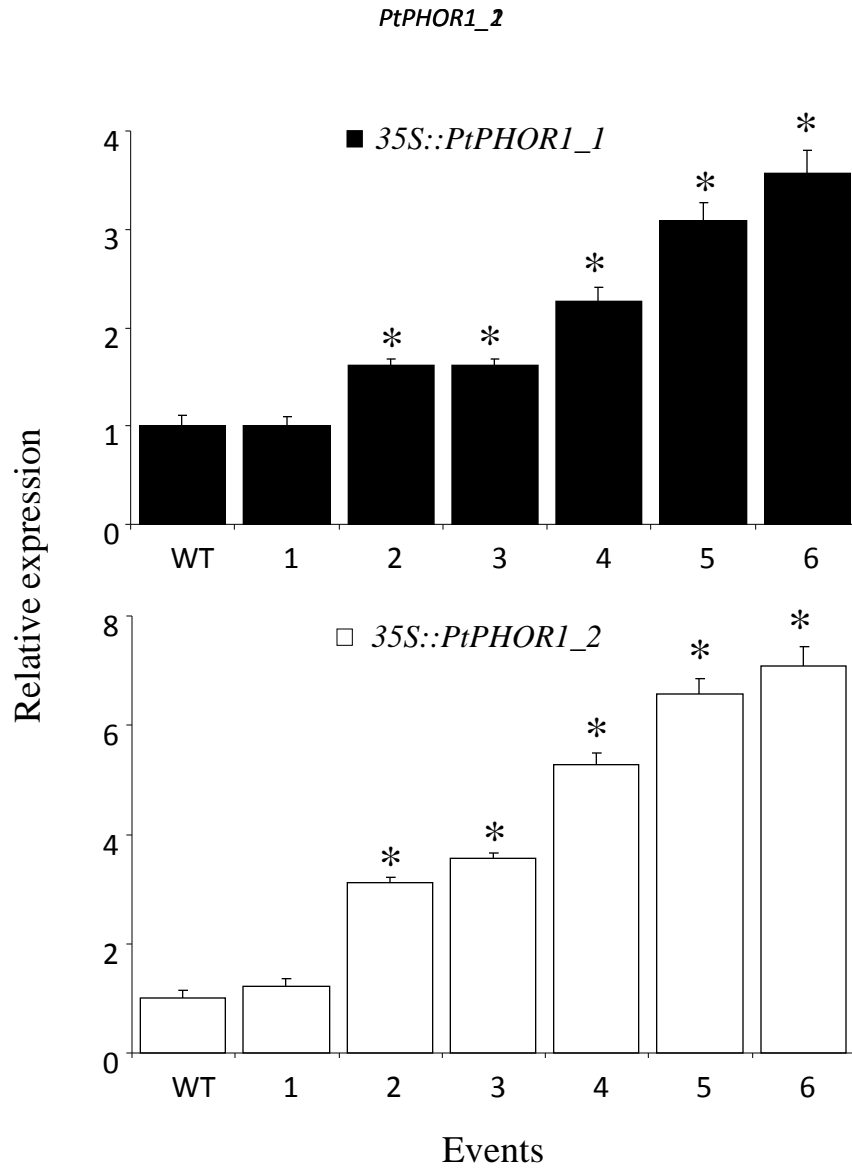

## Supplemental Figure 2

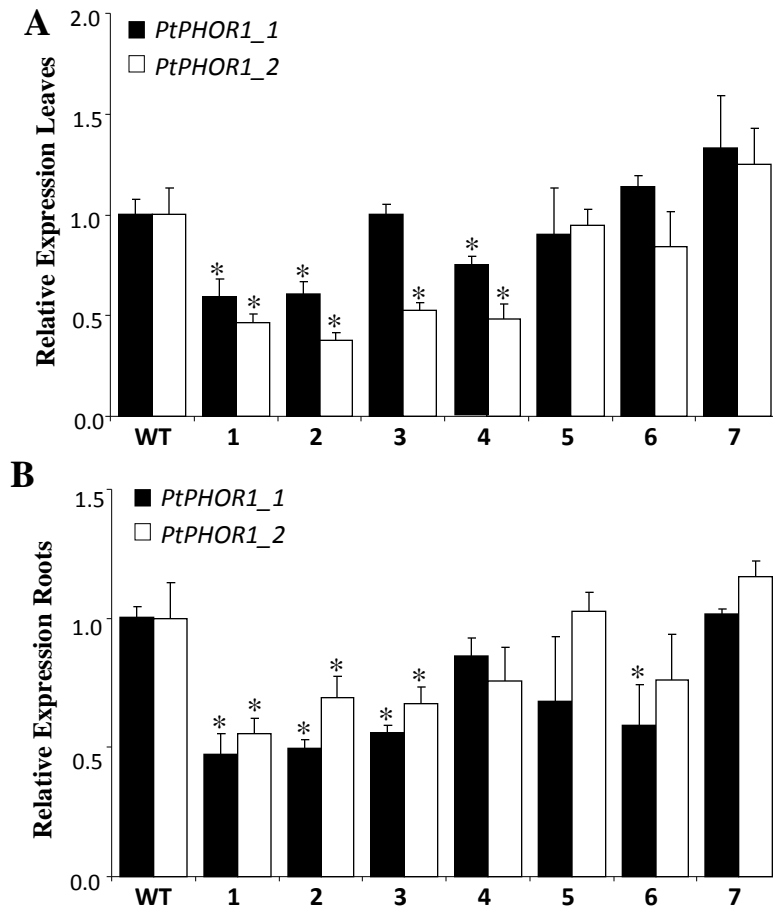

Supplement: supp_ers217_jexbot074880_file001.pdf [file supp_ers217_jexbot074880_file001.pdf]
